# Supplementary material
Source: HighWire-hosted journal article supplement (https://jnm.snmjournals.org/highwire/filestream/95005/field_highwire_adjunct_files/0/170548_Supplemental_Data.pdf)
Supplement: 170548_Supplemental_Data.pdf [file 170548_Supplemental_Data.pdf]

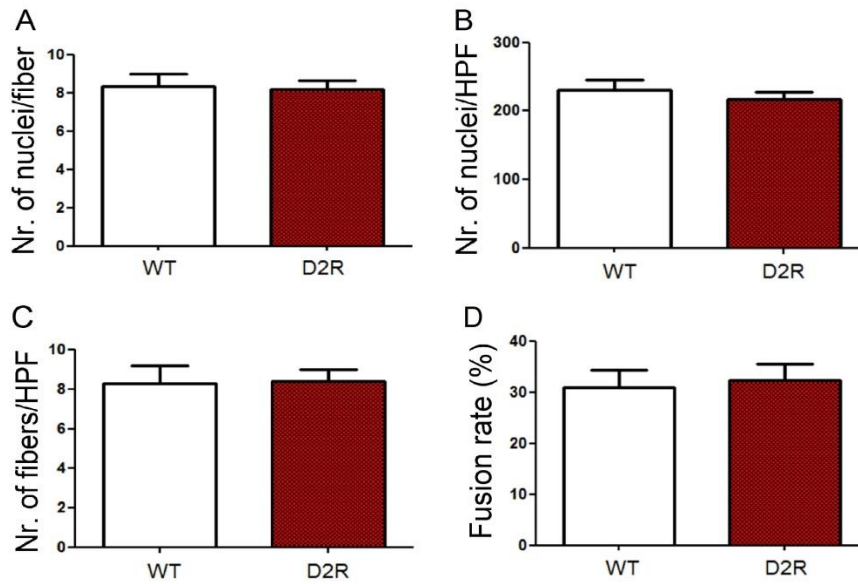

Supplemental Figure 1. The ability to form fibers was not affected by the viral infection. The number of nuclei/fiber (A), number of nuclei/HPF (B), number of fibers/HPF (C), and resulting fusion rate (D) remained unaffected after transduction. HPF: high-power field.

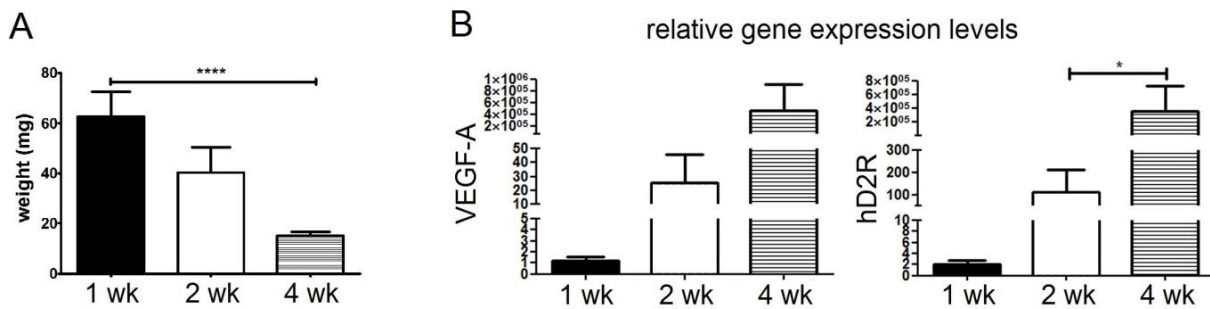

Supplemental Figure 2. Harvested bioengineered muscle tissues decreased in weight over time (A). RTPCR analysis revealed increased VEGF-A and hD2R relative gene expression levels over time (B).
